# Supplementary material for: The dose distribution in dominant intraprostatic tumour lesions defined by multiparametric MRI and PSMA PET/CT correlates with the outcome in patients treated with primary radiation therapy for prostate cancer
Source: PubMed Central journal article supplement (PMC5898009; doi:10.1186/s13014-018-1014-1), 2018-04-12
Supplement: 13014_2018_1014_MOESM1_ESM.pdf [file 13014_2018_1014_MOESM1_ESM.pdf]

**Additional table 1. Patient characteristics**

|                                     |                         |
|-------------------------------------|-------------------------|
| Median age in years (range)         | 74 (56-85)              |
| Median initial PSA in ng/ml (range) | 10.3 (3.1-47)           |
| Biopsy Gleason score, n (%)         |                         |
| 6                                   | 19 (14)                 |
| 7a                                  | 49 (36)                 |
| 7b                                  | 43 (31)                 |
| 8                                   | 17 (12)                 |
| 9                                   | 10 (7)                  |
| 10                                  | 0                       |
| Clinical T stage, n (%)             |                         |
| 2a                                  | 20 (14)                 |
| 2b                                  | 24 (17)                 |
| 2c                                  | 55 (40)                 |
| 3a                                  | 30 (22)                 |
| 3b                                  | 9 (7)                   |
| D'Amico risk group, n (%)           |                         |
| low-risk                            | 2 (1)                   |
| intermediate-risk                   | 33 (24)                 |
| high-risk                           | 103 (75)                |
| Median, mean Volume, ml (range)     |                         |
| PG                                  | 49.4, 53.2 (21.9-187.6) |
| SPG                                 | 45.1, 48.2 (17.6-177)   |
| DIL-imaging                         | 3.6, 5 (0.3-38)         |

Abbreviation: n = number of patients
