# Supplementary material for: The dose distribution in dominant intraprostatic tumour lesions defined by multiparametric MRI and PSMA PET/CT correlates with the outcome in patients treated with primary radiation therapy for prostate cancer
Source: PubMed Central journal article supplement (PMC5898009; doi:10.1186/s13014-018-1014-1), 2018-04-12
Supplement: 13014_2018_1014_MOESM2_ESM.pdf [file 13014_2018_1014_MOESM2_ESM.pdf]

**Additional table 2. Spearman's rho test**

|       | DIL-imaging with<br>SPG | DIL-imaging with<br>PG | PG with SPG |
|-------|-------------------------|------------------------|-------------|
| Dmean | 0.93                    | 0.94                   | 1           |
| Dmax  | 0.89                    | 0.91                   | 0.99        |
| Dmin  | 0.72                    | 0.73                   | 1           |

Spearman's rho values are listed. The respective p values were all < 0.001.
